# Supplementary material for: The effects of blueberry and strawberry serum metabolites on age-related oxidative and inflammatory signalingin vitro
Source: Royal Society of Chemistry journal article supplement (doi:10.1039/c9fo01913h), 2019-01-01
Supplement: c9fo01913h1.pdf [file c9fo01913h1.pdf]

Electronic Supplementary Information (ESI)

**Table S1.** Phenolic composition of the blueberry powder used in the blueberry supplementation study.

| Phenolic compounds        | Blueberry powder<br>(mg/100 g of dry<br>powder) |
|---------------------------|-------------------------------------------------|
| 3-Chlorogenic acid        | 137.0                                           |
| cyanidin-3-arabinoside    | 28.2                                            |
| Cyanidin-3-galactoside    | 65.1                                            |
| Cyanidin-3-glucoside      | 60.9                                            |
| cyanidin-3-xyloside       | 1.5                                             |
| Delphinidin-3-arabinoside | 39.7                                            |
| Delphinidin-3-galactoside | 31.4                                            |
| Delphinidin-3-glucoside   | 26.3                                            |
| Delphinidin-3-xyloside    | 1.8                                             |
| Malvidin-3-arabinoside    | 59.5                                            |
| Malvidin-3-galactoside    | 71.4                                            |
| Malvidin-3-glucoside      | 44.0                                            |
| Malvidin-3-xyloside       | 2.3                                             |
| Peonidin-3-arabinoside    | 6.5                                             |
| Peonidin-3-galactoside    | 58.1                                            |
| Peonidin-3-glucoside      | 14.9                                            |
| Peonidin-3-xyloside       | 1.1                                             |
| Petunidin-3-arabinoside   | 26.2                                            |
| Petunidin-3-galactoside   | 43.2                                            |
| Petunidin-3-glucoside     | 30.3                                            |
| Petunidin-3-xyloside      | 1.9                                             |

Phenolic compounds analyzed by Amandeep Sandhu at Institute for Food, Safety, and Health at Illinois Institute of Technology, Bedford Park, IL using liquid chromatography–mass spectrometry<sup>31,32</sup>

**Table S2.** Phenolic composition of the strawberry powder used in the strawberry supplementation study.

| Phenolic compounds                                  | Strawberry powder<br>(mg/100 g of dry<br>powder) |
|-----------------------------------------------------|--------------------------------------------------|
| Gallic acid                                         | 0.40                                             |
| 3,4-dihydrobenzoic acid                             | 0.16                                             |
| Procyanidin B1                                      | 30.62                                            |
| (+)-catechin                                        | 25.04                                            |
| Cyanidin-3-glucoside                                | 11.63                                            |
| Syringic acid                                       | 0.02                                             |
| Pelargonidin-3-glucoside                            | 396.90                                           |
| p-coumaric acid                                     | 0.26                                             |
| 2-hydroxycinnamic acid                              | 0.20                                             |
| Rutin (quercetin-rutinoside)                        | 3.35                                             |
| Ellagic acid                                        | 12.59                                            |
| Isoquercetin (quercetin-glucoside)                  | 6.62                                             |
| Sinapic acid                                        | 0.40                                             |
| Tiliroside (kaempferol-3-glucoside-6''-p-coumaroyl) | 0.74                                             |
| Quercetin                                           | 1.46                                             |
| Kaempferol                                          | 0.36                                             |

Phenolic compounds analyzed by Jack Cappozzo at Institute for Food, Safety, and Health at Illinois Institute of Technology, Bedford Park, IL using liquid chromatography–mass spectrometry<sup>31,32</sup>
